# Supplementary material
Source: publisher figshare collection journal article supplement (https://aacr.figshare.com/articles/dataset/_/22432506)
Supplement: Supplementary file 1 [file 39878895]

Supplementary Figure S1

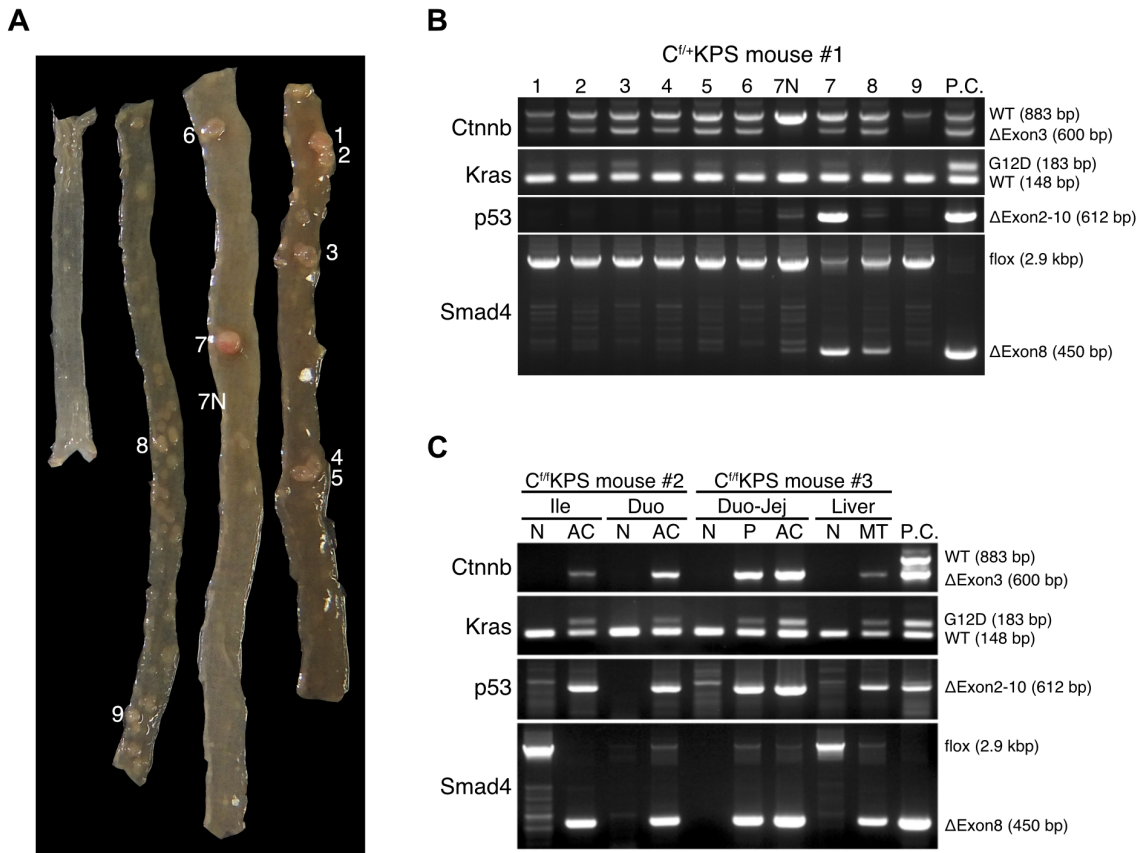

**Supplementary Figure S1. Genotyping analysis of CKPS tumors.** (A) A photograph of the intestines of a CKPS mouse (#1). (B) Genotyping analysis of intestinal tumors in CKPS mouse #1. Numbers indicate individual tumors shown in (A) except 7N (normal mucosa). (C) Genotyping analysis of small polyps (P), large adenocarcinomas (AC), and liver metastasis (MT) in CKPS mice. P.C., positive control.
